# Supplementary material for: A Revised Temperature-Dependent Remineralization Scheme for the Community Earth System Model (v1.2.2)
Source: Copernicus journal article supplement (doi:10.5194/egusphere-2025-3808), 2025-09-16
Supplement: Supplementary file 1 [file egusphere-2025-3808-supplement.pdf]

# Supplemental Materials

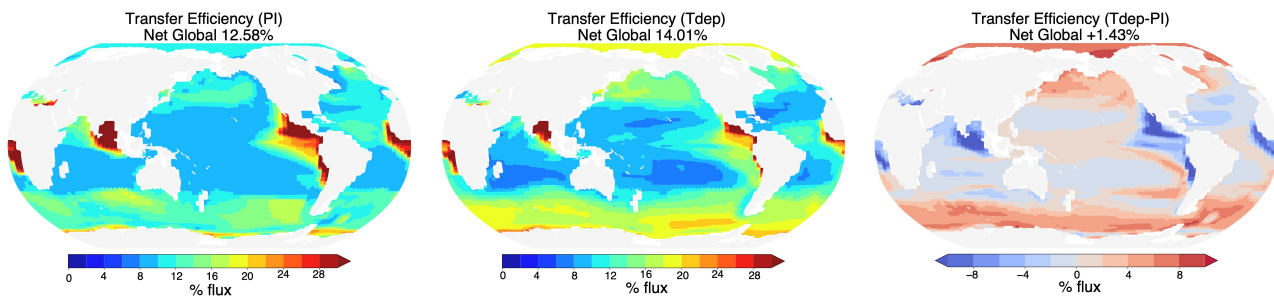

**Figure S1. Global transfer efficiency map.** Low-resolution configuration for PI control (left) and Tdep simulations (center), as well as difference (right). Net global transfer efficiency is noted.

5

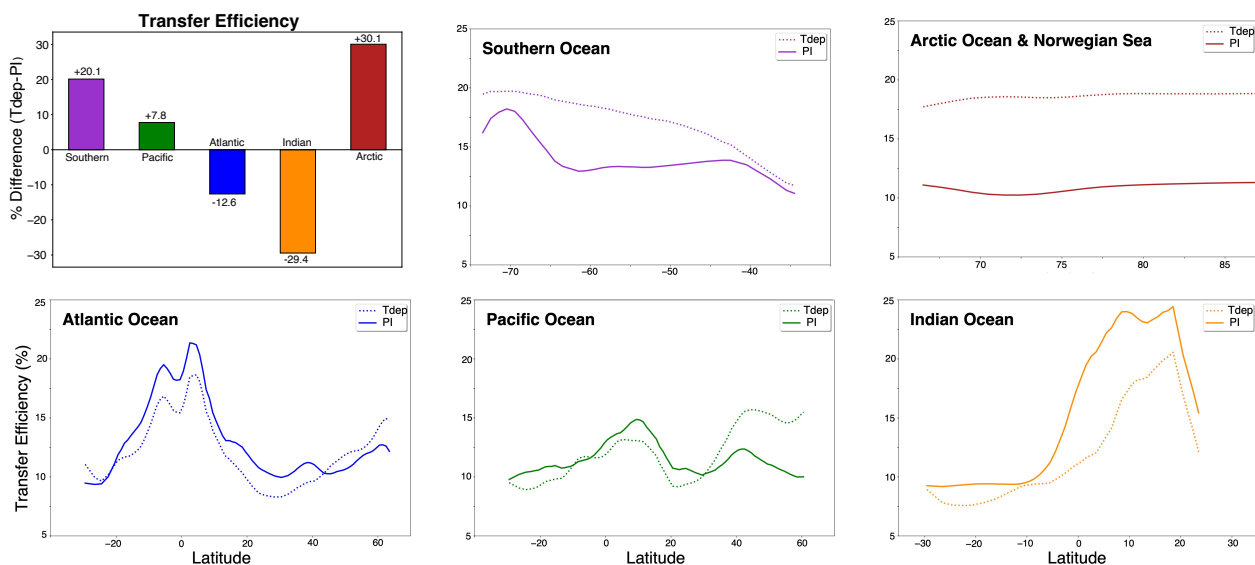

**Figure S2. Zonally averaged transfer efficiency.** Global assessment of zonally averaged transfer efficiency for low-resolution simulations. Inset shows basin-scale average for transfer efficiency by latitudinal band.

10

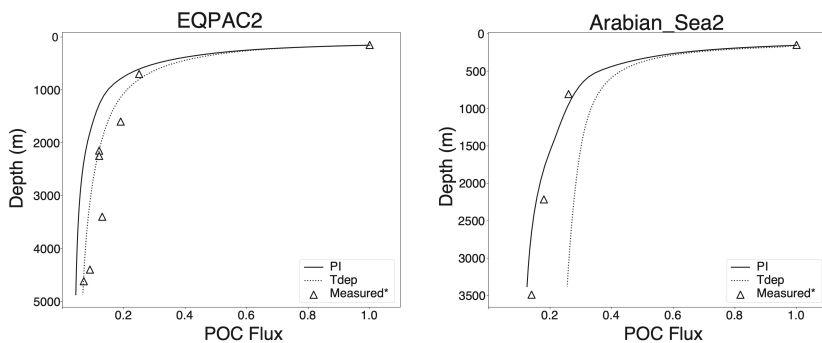

**Figure S3. Zonally averaged transfer efficiency.** Low-resolution results for two sites differing from high-resolution simulation.

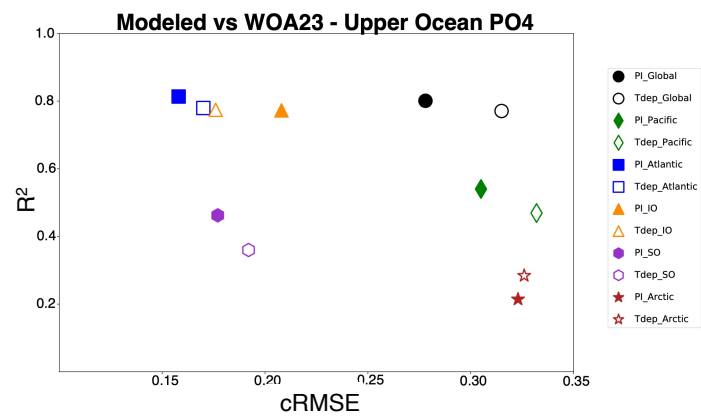

**Figure S4. Upper ocean PO4.** Low-resolution results for averaged upper 100 meters versus WOA23.
